# Supplementary material for: Trend and determinants of quality of family planning counseling in Ethiopia: Evidence from repeated PMA cross-sectional surveys, (2014–2019)
Source: PubMed Central journal article supplement (PMC9140310; doi:10.1371/journal.pone.0267944), 2022-05-27
Supplement: pone.0267944.s001.pdf [file pone.0267944.s001.pdf]

## Appendix

**Table (A1).** Percentage (weighted) of women who received family planning counseling by selected covariates (1, 2, and 3 represents women who got one, two and three counseling services<sup>†</sup>, respectively.)

| Factor                 | 2014(n=3886) |      |      | 2015(n=2450) |      |      | 2016(n=2503) |      |      | 2017(n=2366) |      |      | 2018(n=2353) |      |      | 2019(n=2036) |      |      |
|------------------------|--------------|------|------|--------------|------|------|--------------|------|------|--------------|------|------|--------------|------|------|--------------|------|------|
|                        | 1            | 2    | 3    | 1            | 2    | 3    | 1            | 2    | 3    | 1            | 2    | 3    | 1            | 2    | 3    | 1            | 2    | 3    |
| <b>Total</b>           | 24.4         | 10.9 | 27.6 | 21.1         | 8.1  | 38.6 | 24.0         | 11.4 | 32.2 | 23.8         | 8.9  | 31.6 | 23.0         | 11.2 | 29.0 | 32.3         | 10.7 | 11.8 |
| <b>Residence</b>       |              |      |      |              |      |      |              |      |      |              |      |      |              |      |      |              |      |      |
| Urban                  | 26.1         | 9.1  | 29.7 | 23.0         | 8.8  | 37.4 | 22.4         | 9.9  | 34.1 | 24.1         | 8.2  | 29.5 | 24.0         | 8.1  | 27.0 | 31.0         | 10.4 | 10.8 |
| rural                  | 23.8         | 11.6 | 26.8 | 20.4         | 7.9  | 39.1 | 24.6         | 12.0 | 31.5 | 23.6         | 9.2  | 32.3 | 22.0         | 12.4 | 30.0 | 34.8         | 11.1 | 13.7 |
| <b>Region</b>          |              |      |      |              |      |      |              |      |      |              |      |      |              |      |      |              |      |      |
| Tigray                 | 29.4         | 9.3  | 35.1 | 30.9         | 10.0 | 34.9 | 34.5         | 11.7 | 32.4 | 25.0         | 12.4 | 34.3 | 27.0         | 9.3  | 35.0 | 35.5         | 11.6 | 14.6 |
| Amhara                 | 26.9         | 11.2 | 16.6 | 23.5         | 10.0 | 28.8 | 27.6         | 9.6  | 19.8 | 27.8         | 5.1  | 28.6 | 25.0         | 9.4  | 21.0 | 32.9         | 10.7 | 6.2  |
| Oromia                 | 25.5         | 12.4 | 26.4 | 22.7         | 7.5  | 39.3 | 25.2         | 13.4 | 30.6 | 20.4         | 10.9 | 27.7 | 25.0         | 11.5 | 27.0 | 34.4         | 11.5 | 11.7 |
| SNNP                   | 18.2         | 10   | 39.5 | 14.7         | 6.5  | 49.3 | 17.4         | 11.3 | 49.2 | 23.6         | 11.1 | 40.7 | 16.0         | 14.6 | 39.0 | 28.0         | 8.9  | 13.9 |
| Addis Ababa            | 22.8         | 8.7  | 41.4 | 23.9         | 7.7  | 33.5 | 17.7         | 10.0 | 36.9 | 21.3         | 9.3  | 38.9 | 18.0         | 12.3 | 41.0 | 29.8         | 10.7 | 23.3 |
| Other*                 | 22.1         | 7.8  | 28.8 | 12.0         | 5.5  | 51.0 | 22.3         | 12.9 | 26.7 | 20.6         | 8.2  | 23.7 | 19.0         | 6.1  | 36.0 | 27.4         | 10.4 | 23.5 |
| <b>Wealth Quintile</b> |              |      |      |              |      |      |              |      |      |              |      |      |              |      |      |              |      |      |
| Lowest                 | 21.7         | 10.7 | 28.2 | 18.9         | 8.7  | 36.8 | 23.6         | 12.5 | 33.6 | 22.5         | 9.8  | 32.5 | 19.0         | 15.4 | 29.0 | 30.0         | 10.1 | 11.8 |
| Lower                  | 21.5         | 11.7 | 26.6 | 19.7         | 7.8  | 34.4 | 23.5         | 10.4 | 26.7 | 21.6         | 8.3  | 34.7 | 22.0         | 11.9 | 28.0 | 34.3         | 8.2  | 7.4  |
| Middle                 | 26.4         | 11.1 | 24.9 | 20.5         | 8.5  | 41.2 | 26.2         | 12.7 | 28.8 | 21.4         | 7.9  | 25.4 | 22.0         | 13.0 | 31.0 | 28.9         | 12.0 | 12.1 |
| Higher                 | 25.8         | 10.8 | 26.0 | 19.8         | 8.4  | 41.1 | 25.0         | 11.6 | 35.5 | 27.9         | 11.0 | 30.8 | 28.0         | 9.7  | 26.0 | 32.3         | 10.6 | 11.1 |
| Highest                | 24.9         | 10.6 | 30.8 | 24.7         | 7.6  | 38.7 | 22.3         | 10.3 | 34.9 | 23.7         | 7.6  | 33.2 | 22.0         | 8.3  | 31.0 | 35.2         | 11.7 | 15.3 |
| <b>Education</b>       |              |      |      |              |      |      |              |      |      |              |      |      |              |      |      |              |      |      |
| Never attained         | 24.0         | 12.5 | 25.0 | 20.9         | 6.0  | 39.2 | 24.7         | 12.0 | 30.3 | 21.3         | 9.2  | 33.4 | 24.0         | 11.9 | 28.0 | 30.4         | 10.4 | 10.8 |
| Primary                | 24.6         | 8.9  | 29.0 | 22.9         | 11.0 | 35.1 | 24.8         | 10.6 | 31.9 | 25.0         | 9.7  | 29.3 | 22.0         | 11.3 | 30.0 | 31.5         | 9.1  | 11.2 |
| Secondary/higher       | 25.3         | 10.7 | 32.0 | 18.2         | 8.3  | 43.7 | 20.7         | 11.7 | 37.0 | 26.3         | 7.0  | 32.1 | 24           | 9.6  | 29.0 | 36.7         | 13.9 | 14.3 |
| <b>Age (year)</b>      |              |      |      |              |      |      |              |      |      |              |      |      |              |      |      |              |      |      |
| 15-19                  | 21.3         | 10.2 | 23.9 | 16.7         | 8.1  | 29.8 | 20.6         | 8.3  | 20.2 | 24.3         | 6.4  | 15.6 | 26.0         | 9.5  | 17.0 | 32.0         | 10.5 | 6.1  |
| 20-24                  | 26.3         | 11.7 | 23.2 | 19.6         | 9.5  | 35.7 | 28.6         | 10.5 | 25.6 | 22.0         | 10.8 | 27.4 | 21.0         | 9.8  | 25.0 | 34.3         | 8.5  | 9.7  |
| 25-34                  | 25.3         | 9.6  | 28.2 | 23.0         | 7.2  | 40.1 | 22.5         | 11.0 | 36.2 | 26.6         | 8.8  | 33.2 | 24.9         | 12.0 | 31.4 | 30.6         | 11.9 | 14.3 |
| 35-49                  | 22.3         | 12.9 | 30.9 | 20.8         | 8.5  | 41.3 | 24.2         | 13.6 | 33.9 | 20.0         | 8.6  | 38.1 | 20.1         | 11.5 | 31.5 | 33.8         | 10.4 | 11.1 |
| <b>Marital Status</b>  |              |      |      |              |      |      |              |      |      |              |      |      |              |      |      |              |      |      |
| Never married          | 22.7         | 12.3 | 16.7 | 18.4         | 12.0 | 25.8 | 27.7         | 7.6  | 18.4 | 12.2         | 3.6  | 19.6 | 17.0         | 4.5  | 17.0 | 22.9         | 5.9  | 10.8 |
| Married/in union       | 23.9         | 11.0 | 28.4 | 21.1         | 8.1  | 39.9 | 23.7         | 11.3 | 33.4 | 24.1         | 9.3  | 32.6 | 23.0         | 11.4 | 30.0 | 33.2         | 11.2 | 11.6 |
| Divorced/widowed       | 33.7         | 9.1  | 22.3 | 24.0         | 5.2  | 30.4 | 26.2         | 15.4 | 25.3 | 27.0         | 6.8  | 24.9 | 19.0         | 13.3 | 24.0 | 20.9         | 4.2  | 15.8 |
| <b>Parity</b>          |              |      |      |              |      |      |              |      |      |              |      |      |              |      |      |              |      |      |
| 0 Child                | 24.2         | 9.2  | 19.9 | 19.4         | 8.4  | 29.0 | 21.5         | 7.8  | 22.0 | 20.6         | 5.5  | 17.0 | 18.0         | 9.1  | 18.0 | 25.5         | 5.8  | 8.9  |
| 1-2 children           | 25.2         | 10.1 | 28.7 | 20.5         | 8.0  | 39.8 | 25.1         | 11.4 | 32.1 | 27.1         | 9.5  | 30.8 | 26.0         | 10.1 | 29.0 | 34.7         | 10.8 | 12.9 |
| 3+ children            | 24.0         | 11.8 | 28.5 | 22.0         | 8.2  | 40.6 | 23.8         | 12.2 | 34.5 | 22.1         | 9.5  | 36.9 | 22.0         | 12.7 | 33.0 | 31.6         | 11.7 | 11.3 |
| <b>Method source</b>   |              |      |      |              |      |      |              |      |      |              |      |      |              |      |      |              |      |      |
| Hospital               | 24.2         | 9.9  | 20   | 22.2         | 8.6  | 26.4 | 15.8         | 11.4 | 29.8 | 24.3         | 6.7  | 19.3 | 20.7         | 10   | 19.1 | 37.6         | 13   | 16.3 |
| Health post            | 21           | 13   | 28.8 | 18.2         | 6.9  | 48.7 | 25.7         | 12   | 35.1 | 22.9         | 10.6 | 37.2 | 26           | 11.4 | 28.9 | 34.9         | 10.4 | 10.5 |
| Health center          | 27.6         | 10   | 31.3 | 21.9         | 9.6  | 40.3 | 25.8         | 12.7 | 36.2 | 24.1         | 9.6  | 37   | 23.4         | 13.4 | 37   | 32.1         | 11.4 | 12.8 |
| Pharmacy               | 21.9         | 6.5  | 10.3 | 17.6         | 5    | 13.5 | 11           | 6.5  | 11.5 | 15.5         | 3.8  | 11.6 | 10.2         | 2.6  | 6    | 13.1         | 1.3  | 0.7  |
| Others                 | 18.7         | 17.5 | 24.8 | 23.4         | 9    | 36.3 | 18.8         | 8.2  | 21.5 | 18.4         | 9.6  | 23.6 | 23.4         | 5.4  | 25.2 | 34.9         | 5.6  | 10.7 |
| <b>Method type</b>     |              |      |      |              |      |      |              |      |      |              |      |      |              |      |      |              |      |      |
| Short-acting           | 25.0         | 10.4 | 24.6 | 22.4         | 7.4  | 35.5 | 24.5         | 11.7 | 26.0 | 24.9         | 7.6  | 27.0 | 24.0         | 8.2  | 26.0 | 33.7         | 9.6  | 9.6  |
| Long-acting            | 24.4         | 12.1 | 40.6 | 21.1         | 12.0 | 48.0 | 20.9         | 12.8 | 47.8 | 18.1         | 12.3 | 47.2 | 19           | 18.2 | 40.0 | 29.8         | 12.6 | 15.7 |
| <b>Media Exposure</b>  |              |      |      |              |      |      |              |      |      |              |      |      |              |      |      |              |      |      |
| No                     | 25.7         | 11.1 | 20.7 | 22.5         | 7.5  | 32.8 | 25.3         | 10.8 | 25.3 | 26.0         | 8.8  | 27.3 | 25.0         | 10.3 | 24.0 | 30.7         | 8.7  | 9.1  |
| Yes                    | 23.0         | 10.6 | 35.2 | 19.7         | 8.9  | 45   | 22.8         | 11.8 | 40.0 | 21.1         | 8.9  | 37.3 | 21.0         | 12.5 | 36.0 | 34.6         | 13.6 | 15.6 |

<sup>†</sup>The three questions used to measure counselling service are: (a) told about other methods, (b) counseled on side effects, and (c) counseled on what to do if side effects were to occur. \* **Other-** region represents the region Afar, Somali, B-Gumuz, Gambella, Harari, and Dire Dawa.
